# Supplementary material
Source: PubMed Central journal article supplement (PMC4077285)
Supplement: NIHMS603951-supplement-supp_infor.pdf [file NIHMS603951-supplement-supp_infor.pdf]

Suppl. Fig. 1A

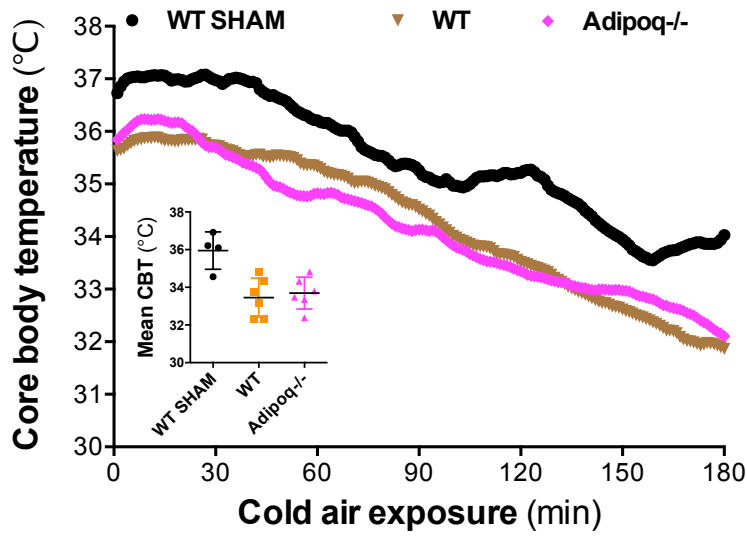

Suppl. Fig. 1B

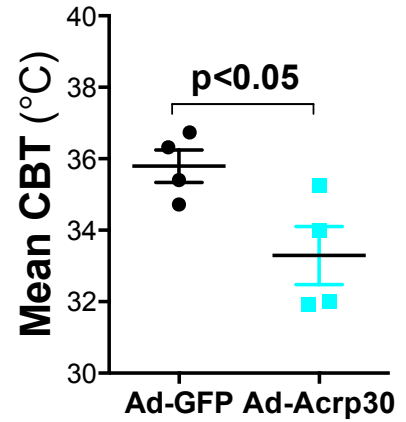

Suppl. Fig. 1C

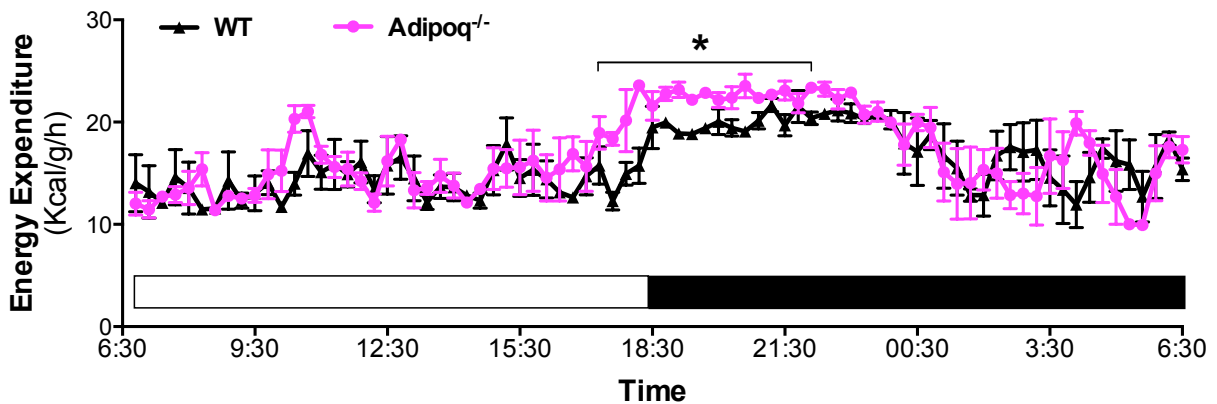

**Supplemental figure 1. Adiponectin suppresses thermogenesis and energy expenditure.** A, iBAT was surgically excised from WT and Adipoq<sup>-/-</sup> mice, using sham-operated WT as control. After 1-week of recovery, CBT was measured during 3h acute cold exposure. B, adenovirus-mediated adiponectin reconstitution reduced CBT of Adipoq<sup>-/-</sup> mice during acute cold exposure (4h). C, energy expenditure rates of Adipoq<sup>-/-</sup> and WT mice were measured using indirect calorimetry and normalized to lean body mass, which was determined using EchoMRI.

Suppl. Fig. 2

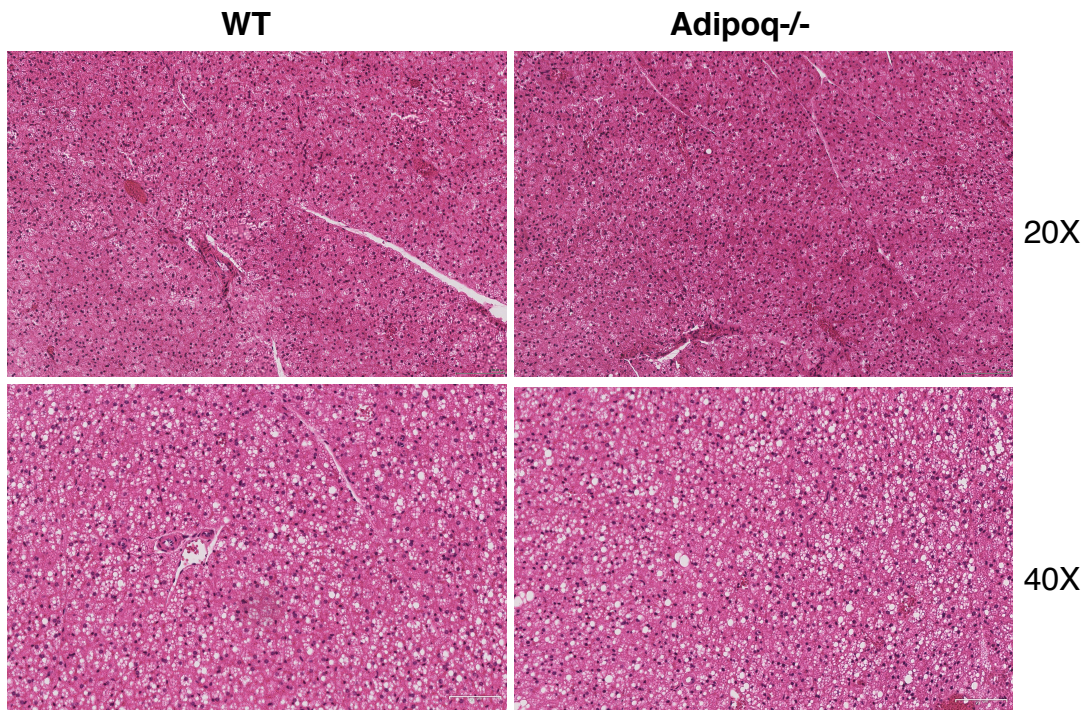

**Supplemental figure 2. iBAT of Adipoq<sup>-/-</sup> mice is histologically indistinguishable from WT control.** The iBAT from male Adipoq<sup>-/-</sup> and WT mice were collected after overnight fasting at room temperature. Sections were stained with H&E.

Suppl. Fig. S3A

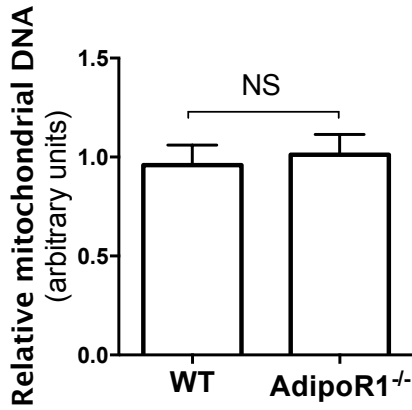

Suppl. Fig. 3B

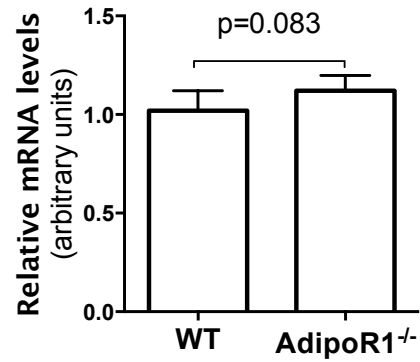

Suppl. Fig. 3C

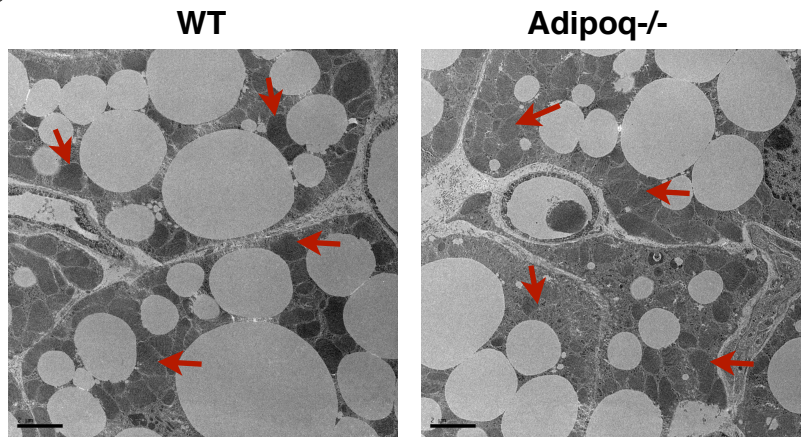

Suppl. Fig. 3E

Suppl. Fig. 3D

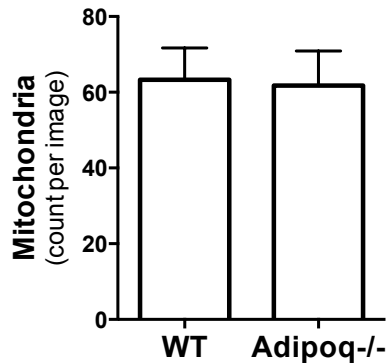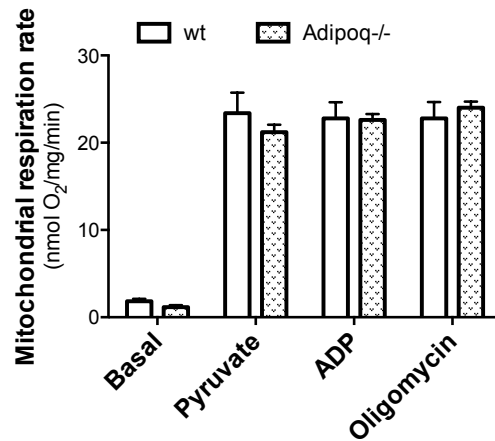

**Supplemental figure 3. Effect of adiponectin on mitochondrial biogenesis and respiration.** iBAT was collected from WT and Adipoq<sup>-/-</sup> mice housed at room temperature. There were no difference in mitochondrial DNA (A), Cox5a mRNA levels (B), mitochondrial structure and density (C&D), and mitochondrial respiration rate using pyruvate as the substrate (E). The images of ultrastructure of iBAT were from electronic microscopy, and the scale bar is 2  $\mu$ m. Mitochondria were counted with randomly chosen images (n=10).

Suppl. Fig. 4A

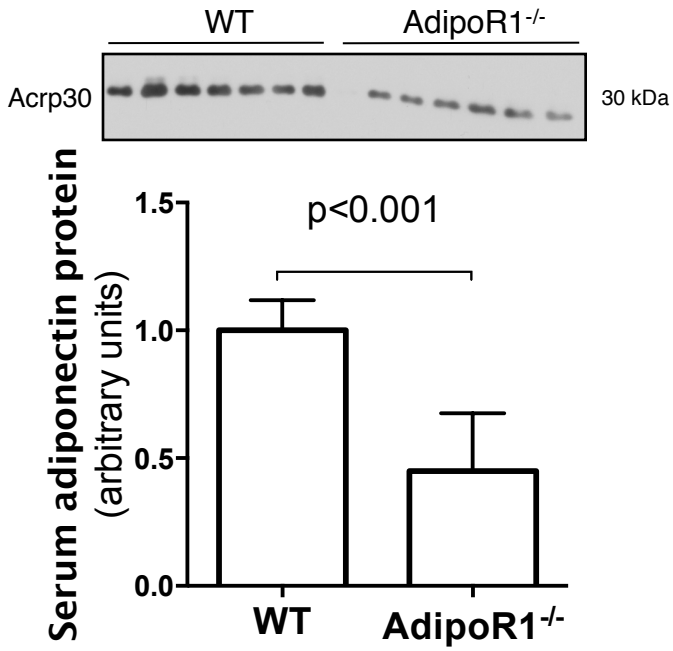

Suppl. Fig. 4B

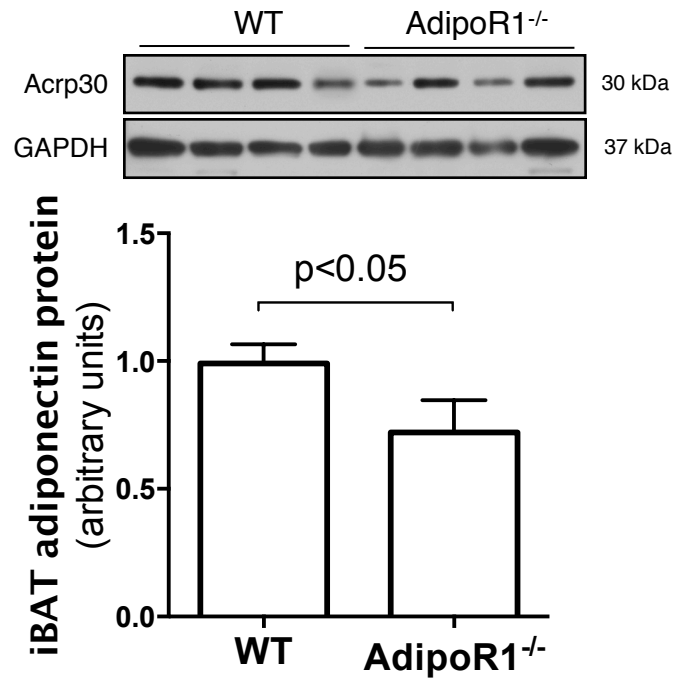

Suppl. Fig. 4C

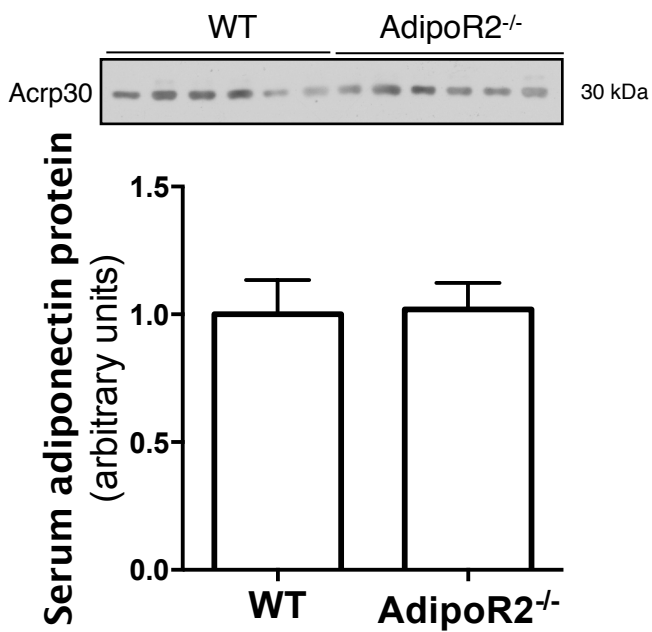

Suppl. Fig. 4D

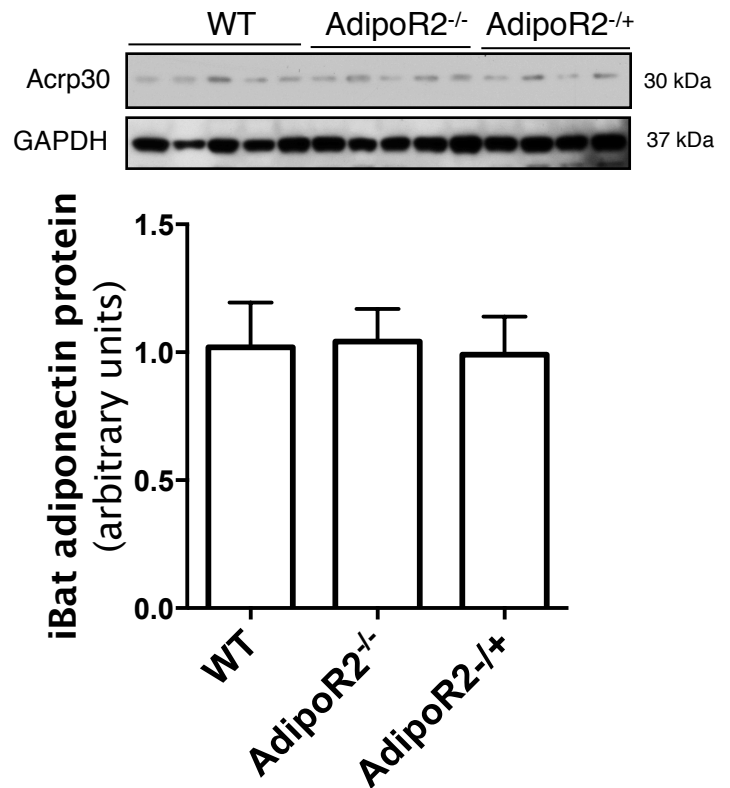

Suppl. Fig. 4E

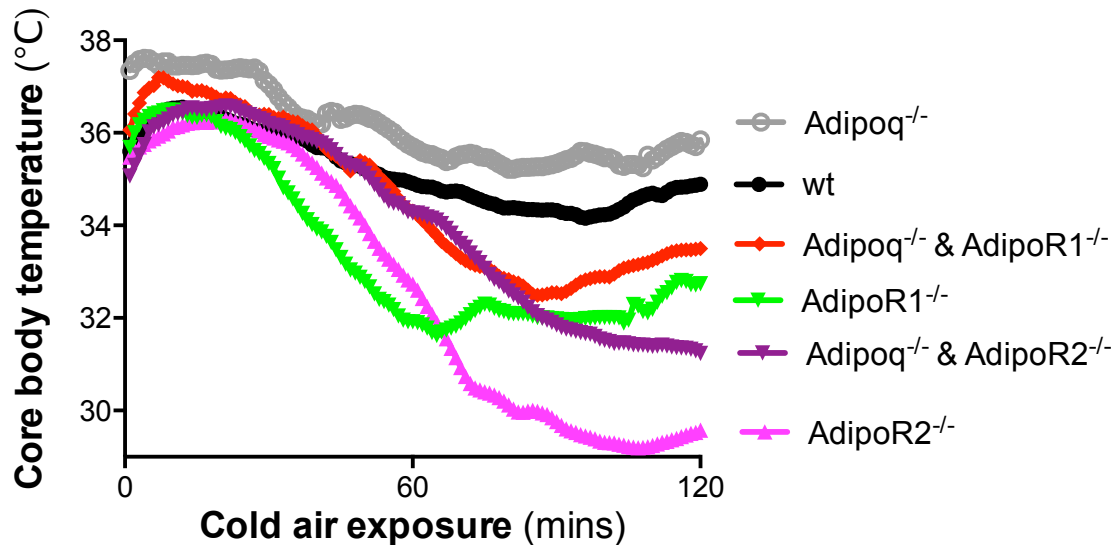

**Supplemental figure 4. Adiponectin knockout in AdipoR1- or AdipoR2-deficient background alleviates hypothermia during cold exposure.** A-D, AdipoR1<sup>-/-</sup>, AdipoR2<sup>-/-</sup>, AdipoR2<sup>-/+</sup> and WT mice were housed at room temperature. Blood (A&C) and iBAT (B&D) were collected from in fasting state, and adiponectin was determined by immunoblotting. 4E, Adipoq<sup>-/-</sup>&AdipoR1<sup>-/-</sup> and Adipoq<sup>-/-</sup>&AdipoR2<sup>-/-</sup> double knockout mice (4-6 weeks old male, n=4-8 per group) were implanted with an emitter. After one week of recovery, CBT was monitored during a 2-hr exposure to 4 °C air.

Suppl. Fig. 5A

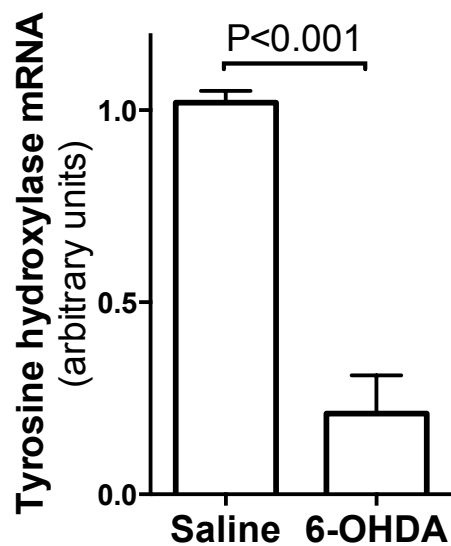

Suppl. Fig. 5B

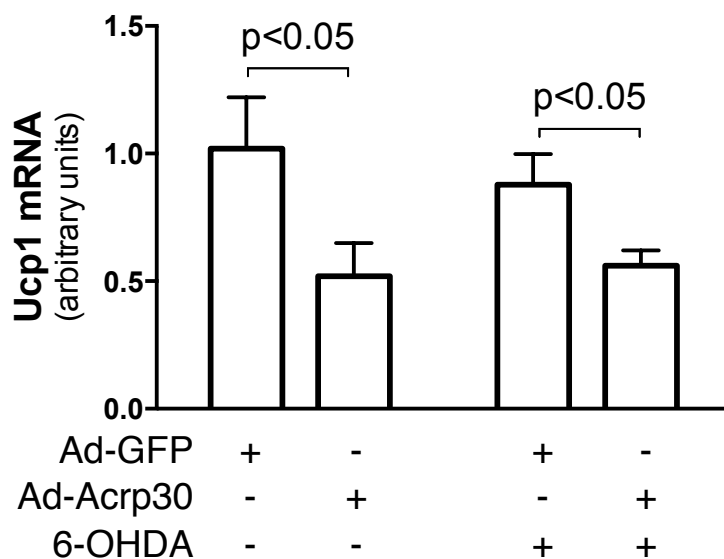

**Supplemental figure 5. iBAT sympathetic denervation in *Adipoq*<sup>-/-</sup> mice does not abolish the inhibitory effects of adiponectin on Ucp1 expression in iBAT.** The neurotoxin 6-hydroxydopamine (6-OHDA) was injected into one side of iBAT of male *Adipoq*<sup>-/-</sup> mice for sympathetic denervation. The contralateral iBAT were injected with saline as control. After 1 week of recovery, Ad-Acrp30 vectors were injected intravenously to reconstitute adiponectin, and iBAT were collected 3 days later to quantify tyrosine hydroxylase (A) and Ucp1 (B) mRNA by real-time PCR. n=5 per group.

Suppl. Fig. 6A

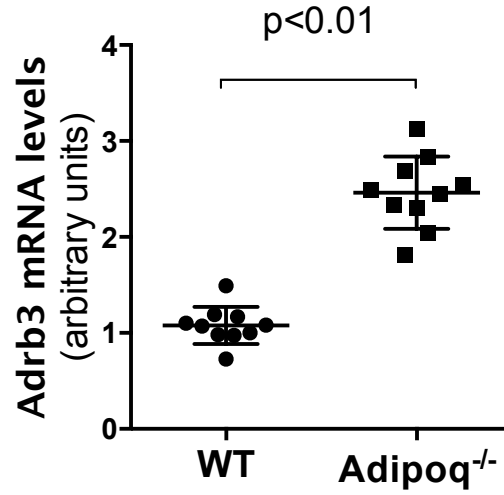

**Supplemental figure 6A. Increased ADRB3 expression in inguinal fat of Adipoq<sup>-/-</sup> mice.** Inguinal fat pads were collected from Adipoq<sup>-/-</sup> and WT control mice at RT. ADRB3 mRNA levels were quantified by real-time PCR.

Suppl. Fig. 6B

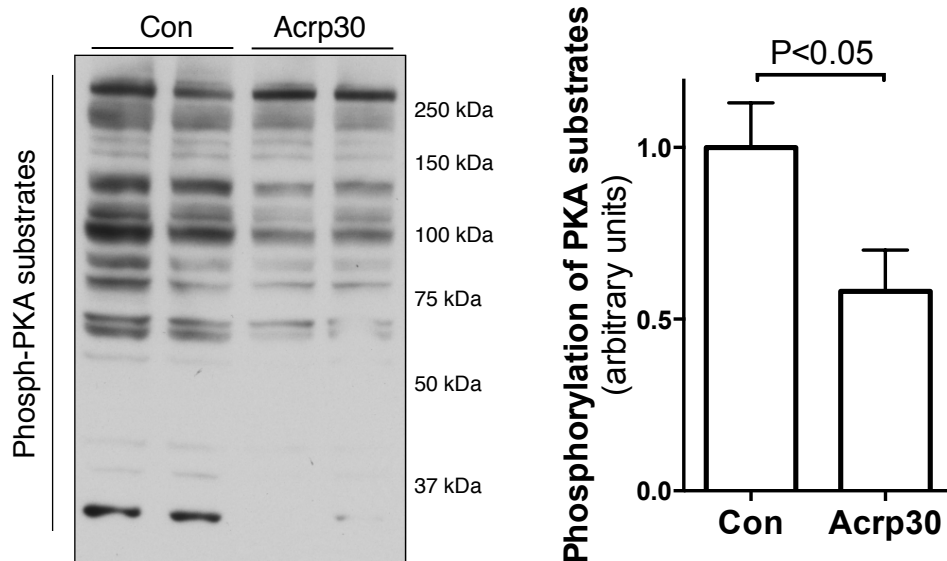

Suppl. Fig. 6C

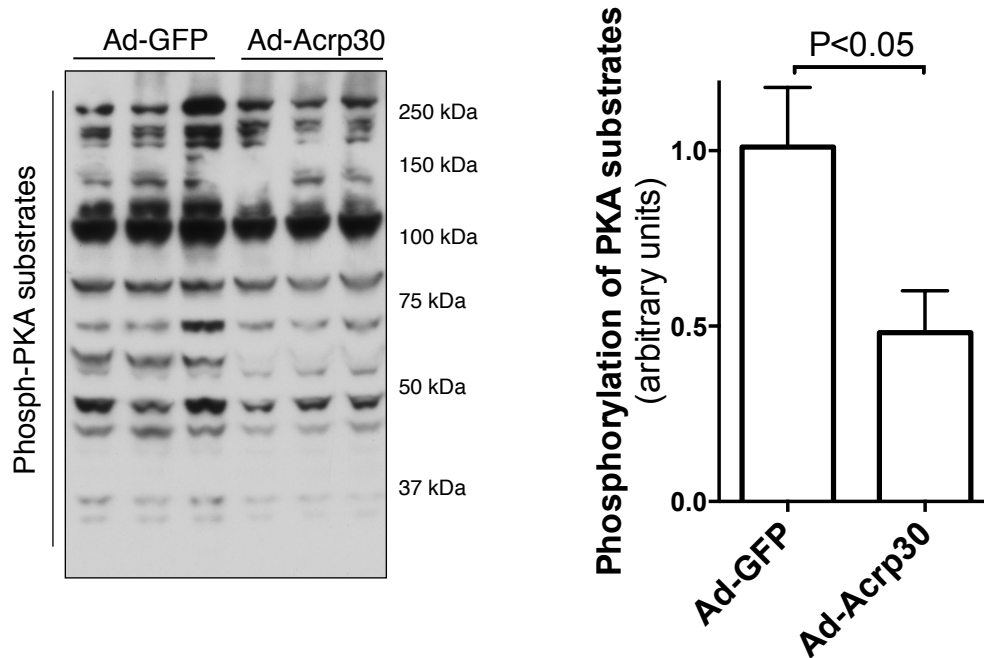

**Supplemental figure 6B&C. Adiponectin reduces PKA substrates phosphorylation in brown adipocytes and iBAT.** B, brown adipocytes differentiated from stromal vascular fraction of iBAT of Adipoq<sup>-/-</sup> mice were treated overnight with Acrp30 using a co-culture system. Protein samples were collected after 30 min treatment of ISO (10  $\mu$ M). C, Adipoq<sup>-/-</sup> mice were transduced with Acrp30-expressing adenovirus to reconstitute adiponectin, using GFP adenovirus as control. iBATs were collected 3 days later. Phosphorylation of PKA substrates were detected by Western blotting using a specific antibody (#9621, Cell Signaling). The density of the bands of phosphorylated PKA substrates was quantified using Quantity One 1-D Analysis Software (BioRad Hercules, CA). For each sample lane, all bands between 250 – 25 kDa were selected and quantified, which represent the total level of phosphorylated PKA substrates of each sample. n=6 for each group.
